# Supplementary material for: Magnetic coagulometry: towards a new nanotechnological tool for ex vivo monitoring coagulation in human whole blood
Source: Royal Society of Chemistry journal article supplement (doi:10.1039/d3nr02593d), 2023-12-21
Supplement: d3nr02593d1.pdf [file d3nr02593d1.pdf]

## Supporting Information

### Magnetic Coagulometry: Towards a New Nanotechnological Tool for *ex vivo* Monitoring Coagulation in Human Whole Blood

Antonio Santana-Otero<sup>a</sup>, Alan Harper<sup>b</sup>, Neil Telling<sup>c</sup>, Daniel Ortega<sup>a,d,e</sup>, David Cabrera<sup>c</sup>

<sup>a</sup> Condensed Matter Physics Department, Faculty of Sciences, University of Cádiz. Campus Universitario Río San Pedro s/n. 11510 Puerto Real (Cádiz) Spain

<sup>b</sup> School of Medicine, Keele University, Newcastle-under-Lyme, Staffordshire. ST5 5BG, UK.

<sup>c</sup> School of Pharmacy and Bioengineering, Keele University, Guy Hilton Research Centre, Thronburrow Drive, Hartshill, Stoke on Trent, ST47QB, UK

<sup>d</sup> iMdea Nanociencia, Campus Universitario de Cantobalco. C/Faraday, 9, 28049, Madrid, Spain.

<sup>e</sup> Institute of Research and Innovation in Biomedical Sciences of Cádiz (INiBICA), University of Cádiz, 11002, Cádiz, Spain

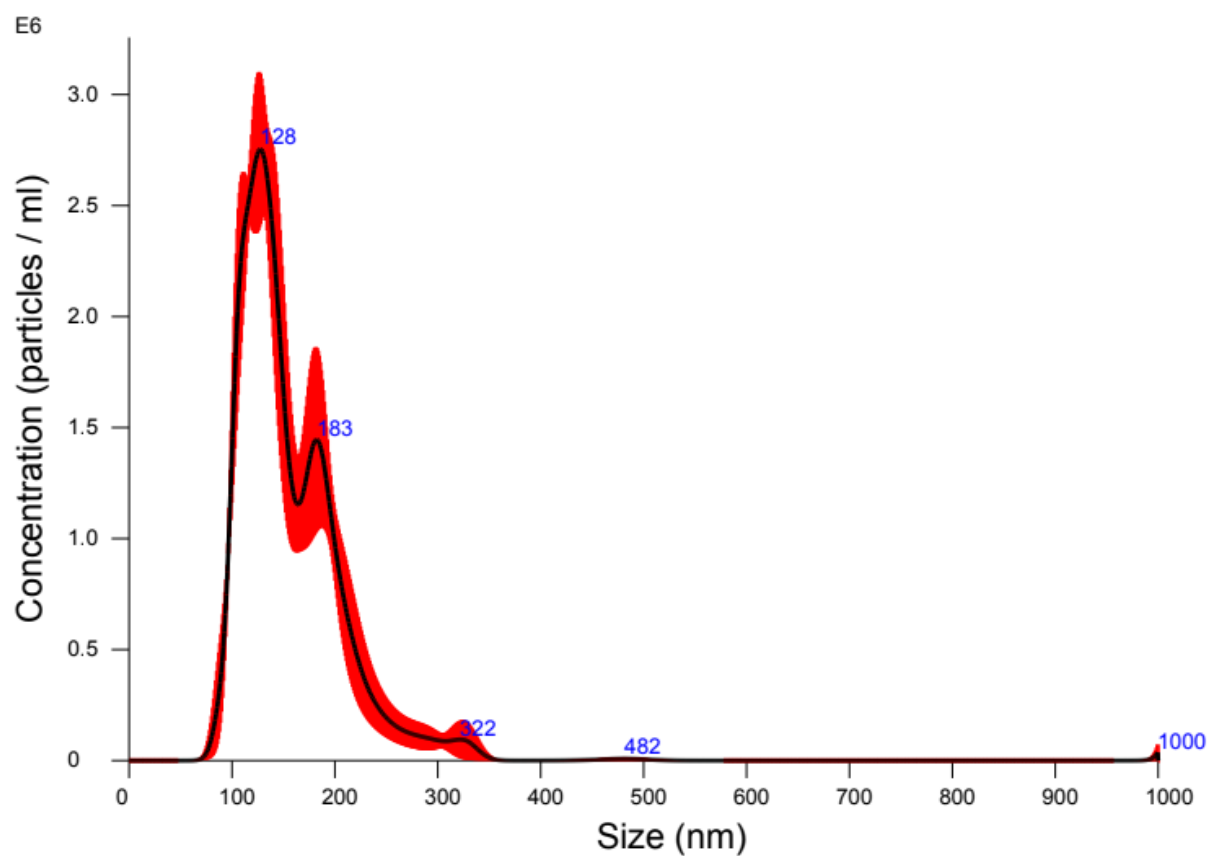

**Figure S1. Nanoparticle Tracking Analysis diagram of IONPs.**

## Supporting Information

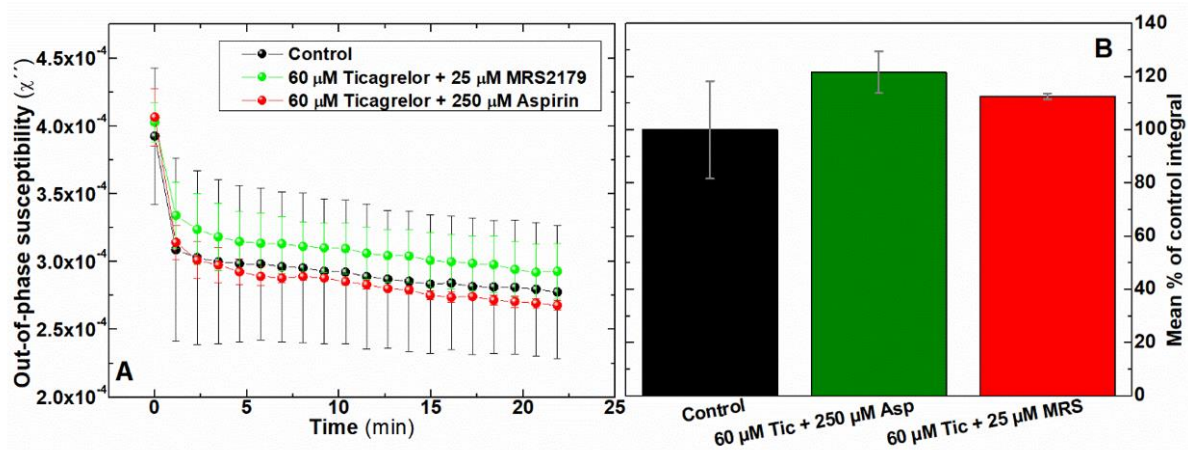

**Figure S2. Preliminary out-of-phase component from AC magnetic susceptibility recorded at 400 Hz show no significant difference in samples pre-treated with combined anti-platelet drugs.** (A) Average traces of out-of-phase component from AC magnetic susceptibility measurements of 0.066 mg<sub>Fe</sub>/mL IONPs dissolved in freshly donated whole human blood, pre-treated with 60  $\mu\text{M}$  Ticagrelor + 25  $\mu\text{M}$  MRS2179, 60  $\mu\text{M}$  Ticagrelor + 250  $\mu\text{M}$  Aspirin or the carrier, recalcified with 20 mM CaCl<sub>2</sub> and activated with 125  $\mu\text{M}$  ADP. (B) Area enclosed below AC susceptibility traces measured in (B).  $n = 3$ , 1 donor. Error bars: SEM

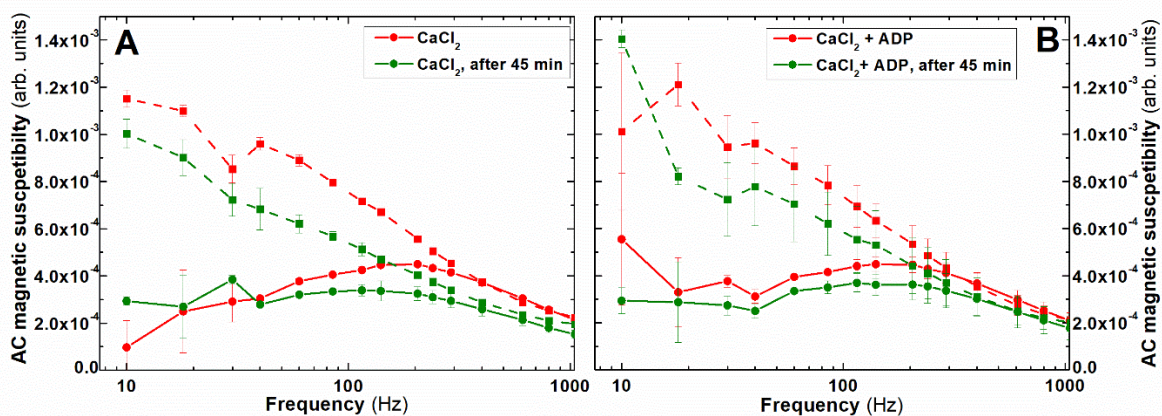

**Figure S3. Frequency spectral mode AC susceptibility measurements of 0.066 mg<sub>Fe</sub>/mL IONPs dissolved freshly donated whole human blood recalcified with 20 mM CaCl<sub>2</sub> and treated with (A) saline solution or (B) 125  $\mu\text{M}$  ADP, recorded at time 0 and after 45 minutes.**  $n = 2$
